# Supplementary material for: Determining the kinetics of desolvation of a TNT/aniline solvate
Source: Royal Society of Chemistry journal article supplement (doi:10.1039/c9ce00515c), 2019-01-01
Supplement: c9ce00515c1.pdf [file c9ce00515c1.pdf]

## Supporting information

# Determining the Kinetics of Desolvation of a TNT/Aniline Solvate

Yong Joon Lee<sup>†</sup>, Nadia Sultana<sup>†</sup>, and Brandon L. Weeks<sup>†</sup>

<sup>†</sup> Department of Chemical Engineering, Texas Tech University, Lubbock, Texas 79409, USA

Corresponding Author:

Brandon L. Weeks,

Department of Chemical Engineering, Texas Tech University, Lubbock, Texas 79409, USA

Email: [brandon.weeks@ttu.edu](mailto:brandon.weeks@ttu.edu)

## **Table of Contents**

Table S1. Crystal data and structure of TNT and TNT/aniline solvates

Table S2. Mean Statistical parameters calculated by model-fitting method

Figure S1. The trace of PXRD patterns at a) RT b) 45°C c) 60°C d) 65°C e) 70°C.

Figure S2. AFM measurement of growth of new crystalline phase at a) 26 °C and b) 45 °C.

Table S1. Crystal data and structure of TNT and TNT/aniline solvates

|                                  | Monoclinic TNT <sup>1</sup>                           | Orthorhombic TNT <sup>1</sup>        | TNT/aniline <sup>2</sup>             |
|----------------------------------|-------------------------------------------------------|--------------------------------------|--------------------------------------|
| Formula weight                   | 227.14                                                | 227.14                               | 320.27                               |
| Crystal system                   | monoclinic                                            | orthorhombic                         | orthorhombic                         |
| Space group                      | P2 <sub>1</sub> /a                                    | Pca2 <sub>1</sub>                    | Pnma                                 |
| a/Å                              | 14.9113(1)                                            | 14.910(2)                            | 18.726(2)                            |
| b/Å                              | 6.0340(1)                                             | 6.034(2)                             | 10.9375(13)                          |
| c/Å                              | 20.8815(3)                                            | 19.680(4)                            | 6.7023(8)                            |
| $\alpha, \beta, \gamma / ^\circ$ | $\alpha = \gamma = 90^\circ,$<br>$\beta = 110.365(1)$ | $\alpha = \beta = \gamma = 90^\circ$ | $\alpha = \beta = \gamma = 90^\circ$ |
| V/Å <sup>3</sup>                 | 1761.37(4)                                            | 1770.6(7)                            | 1372.3(3)                            |
| Z                                | 8                                                     | 8                                    | 4                                    |
| $\rho/\text{g cm}^{-3}$          | 1.654                                                 | 1.654                                | 1.550                                |

1. R. M. Vrcelj, J. N. Sherwood, A. R. Kennedy, H. G. Gallagher and T. Gelbrich, *Cryst. Growth Des.*, 2003, **3**, 1027–1032.

2. CCDC 1919306. CCDC 1919306 contains the supplementary crystallographic data for this paper. These data can be obtained free of charge from the Cambridge Crystallographic Data Centre via [www.ccdc.cam.ac.uk/data\\_request/cif](http://www.ccdc.cam.ac.uk/data_request/cif).

Table S2. Mean Statistical parameters calculated by model-fitting method

|                                               |                                    | Integral form of<br>rate equation                         | 26 °C                 |         | 35 °C                 |         | 45 °C                 |         | 60 °C                 |         |
|-----------------------------------------------|------------------------------------|-----------------------------------------------------------|-----------------------|---------|-----------------------|---------|-----------------------|---------|-----------------------|---------|
|                                               |                                    | $g(\alpha) = kt$                                          | $S_K$                 | $R_K^2$ | $S_K$                 | $R_K^2$ | $S_K$                 | $R_K^2$ | $S_K$                 | $R_K^2$ |
| <b>Geometrical<br/>contraction<br/>models</b> | Contracting<br>cylindrical<br>(R2) | $1 - (1 - \alpha)^{\frac{1}{2}} = kt$                     | $5.80 \times 10^{-9}$ | 0.9998  | $3.59 \times 10^{-8}$ | 0.9978  | $2.00 \times 10^{-8}$ | 0.9999  | $1.59 \times 10^{-7}$ | 0.9998  |
|                                               | Contracting<br>spherical<br>(R3)   | $1 - (1 - \alpha)^{\frac{1}{3}} = kt$                     | $1.73 \times 10^{-8}$ | 0.9980  | $5.22 \times 10^{-8}$ | 0.9921  | $4.72 \times 10^{-8}$ | 0.9986  | $4.10 \times 10^{-7}$ | 0.9990  |
| <b>Diffusion<br/>models</b>                   | 1-D diffusion<br>(D1)              | $\alpha^2 = kt$                                           | $5.55 \times 10^{-8}$ | 0.9856  | $1.27 \times 10^{-7}$ | 0.9781  | $1.90 \times 10^{-7}$ | 0.9899  | $1.17 \times 10^{-6}$ | 0.9938  |
|                                               | 2-D diffusion<br>(D2)              | $[(1 - \alpha)\ln(1 - \alpha)] + a = kt$                  | $7.24 \times 10^{-8}$ | 0.9607  | $1.62 \times 10^{-7}$ | 0.9417  | $2.64 \times 10^{-7}$ | 0.9684  | $1.75 \times 10^{-6}$ | 0.9779  |
|                                               | 3-D diffusion-<br>Jander<br>(D3)   | $\left(1 - (1 - \alpha)^{\frac{1}{3}}\right)^2 = kt$      | $4.89 \times 10^{-8}$ | 0.8970  | $1.04 \times 10^{-7}$ | 0.8589  | $1.83 \times 10^{-7}$ | 0.9102  | $1.33 \times 10^{-6}$ | 0.9269  |
|                                               | Ginstling-<br>Brounshtein<br>(D4)  | $1 - \frac{2}{3}\alpha - (1 - \alpha)^{\frac{2}{3}} = kt$ | $2.37 \times 10^{-8}$ | 0.9431  | $5.20 \times 10^{-8}$ | 0.9179  | $8.74 \times 10^{-8}$ | 0.9526  | $6.02 \times 10^{-7}$ | 0.9647  |
| <b>Reaction-<br/>order<br/>models</b>         | First-order<br>(F1)                | $-\ln(1 - \alpha) = kt$                                   | $2.02 \times 10^{-7}$ | 0.9757  | $4.67 \times 10^{-7}$ | 0.9620  | $7.08 \times 10^{-7}$ | 0.9817  | $4.74 \times 10^{-6}$ | 0.9935  |
|                                               | Second-order<br>(F2)               | $[1(1 - \alpha)] - 1 = kt$                                | $2.63 \times 10^{-6}$ | 0.7531  | $5.23 \times 10^{-6}$ | 0.7011  | $9.74 \times 10^{-6}$ | 0.7735  | $7.84 \times 10^{-5}$ | 0.7885  |
|                                               | Third-order<br>(F3)                | $\frac{1}{2}[(1 - \alpha)]^{-2} - 1 = kt$                 | $2.95 \times 10^{-5}$ | 0.4845  | $5.53 \times 10^{-5}$ | 0.4307  | $1.07 \times 10^{-4}$ | 0.4943  | $9.30 \times 10^{-4}$ | 0.5121  |

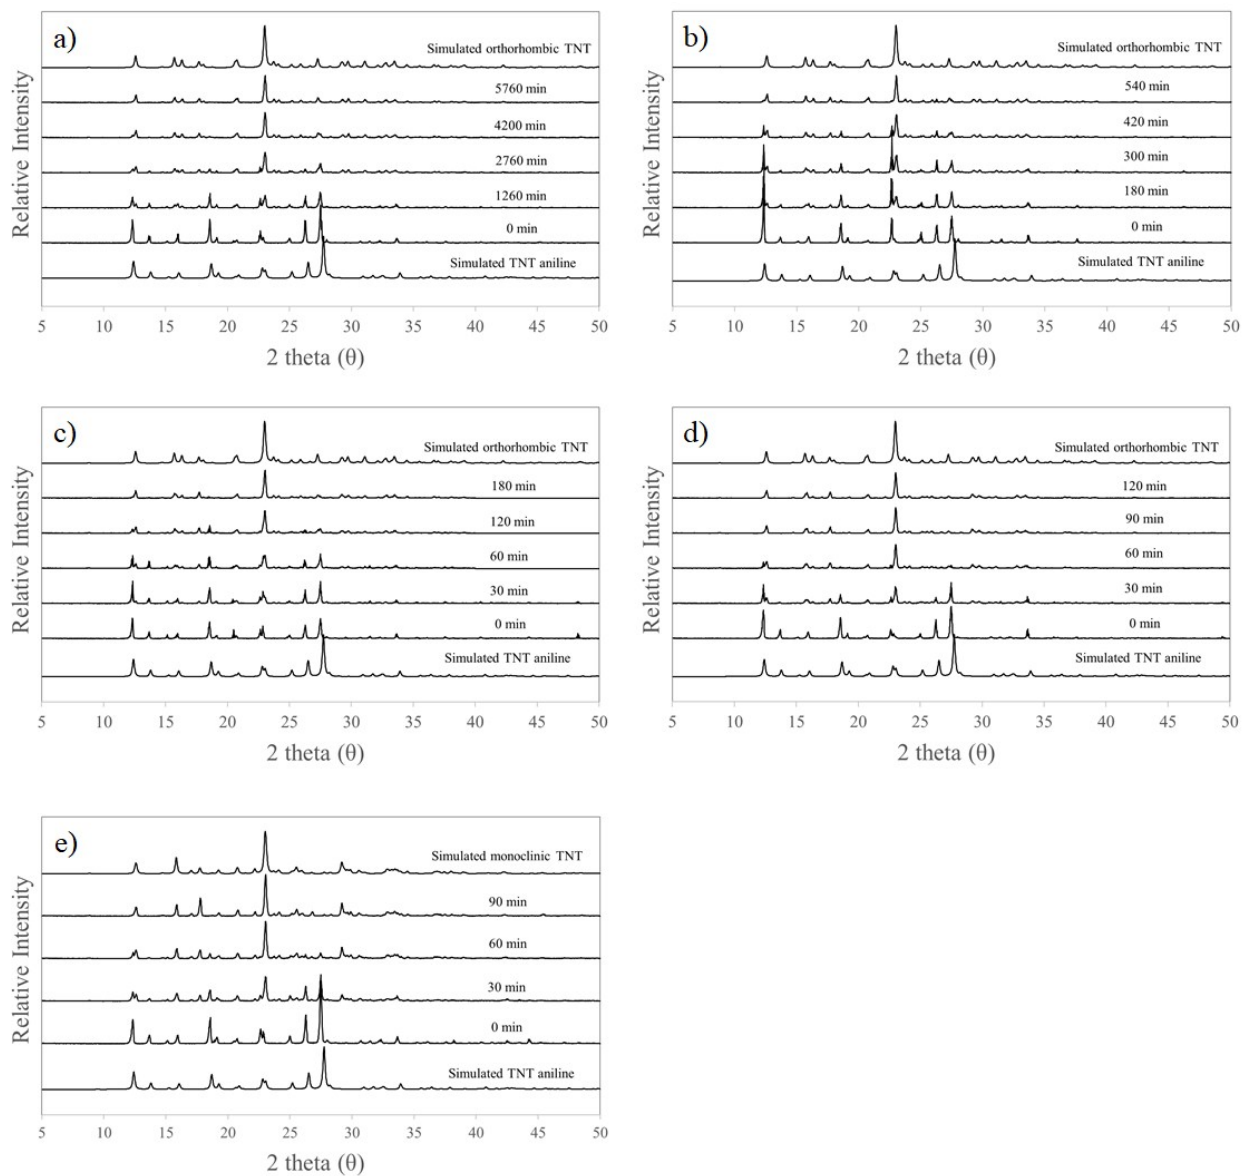

Figure S1. The changes of PXRD Patterns with time at a) RT; b) 45 °C; c) 60 °C; d) 65 °C; e) 70 °C. Simulated PXRD patterns for two polymorphic forms of TNT (monoclinic and orthorhombic) and TNT aniline are also displayed together.

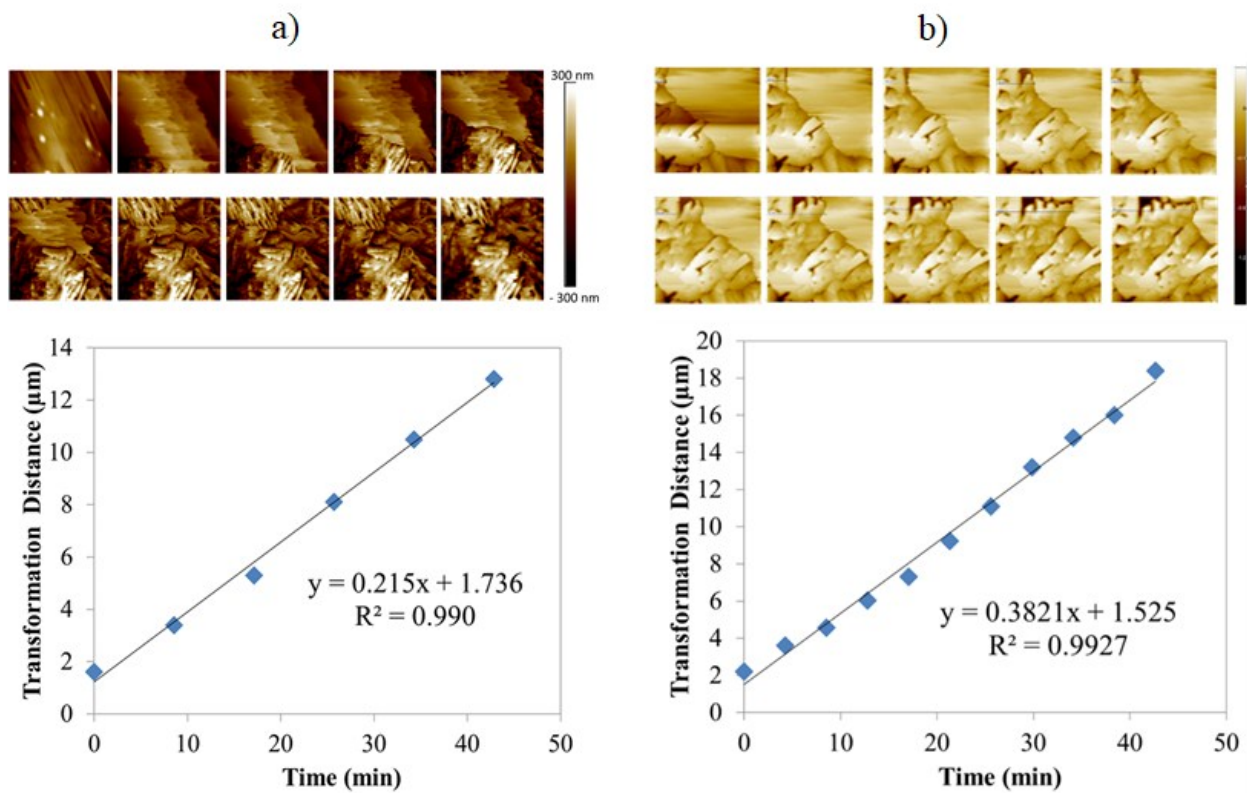

Figure S2. AFM measurement of growth of new crystalline phase at a) 26 °C and b) 45 °C.
